# Supplementary material for: Genomic insights into Lactobacillus gasseri and Lactobacillus paragasseri
Source: PeerJ. 2022 Jun 7;10:e13479. doi: 10.7717/peerj.13479 (PMC9186330; doi:10.7717/peerj.13479)
Supplement: Table S1 [file peerj-10-13479-s001.xlsx]

## Sheet: ST1
Supplementary Table 1. L. gasseri and L. paragasseri genome assemblies.
New Species Classification	Deposited Species Classification	Strain	Assembly Accession #	Isolation source	Size(Mb)	GC%	# Scaffolds
L. gasseri	L. gasseri	ATCC 33323	GCA_000014425	Unknown	1.89436	35.3	1
L. gasseri	L. gasseri	DSM 14869	GCA_002287905	Vaginal	1.95155	35.0427	3
L. gasseri	L. gasseri	HL20	GCA_017638885	Stool	1.98908	35.042	3
L. gasseri	L. gasseri	NCTC13722	GCA_900452355	Unknown	1.89968	35.2	3
L. gasseri	L. gasseri	ATCC 33323	GCA_008868295	Unknown	1.82492	35	34
L. gasseri	L. gasseri	BIO6369	GCA_008868535	Stool	1.87314	35.1	15
L. gasseri	L. gasseri	S1 5006-2	GCA_017565825	Urine	1.79108	34.9	16
L. gasseri	L. gasseri	JCM 1025	GCA_003307315	Intestine	1.86301	34.7	12
L. gasseri	L. gasseri	UMB3077	GCA_007786195	Urine	1.92016	34.7	10
L. gasseri	L. gasseri	SJ-9E-US	GCA_000176995	Vaginal	1.78446	34.9	8
L. gasseri	L. gasseri	1001175st1_D8	GCA_005844525	Stool	1.8688	35.1	11
L. gasseri	L. gasseri	1001175B_160314_D8	GCA_015550315	Stool	1.8688	35.1	11
L. gasseri	L. gasseri	770_LJOH	GCA_001066235	Lungs	1.79293	34.9	40
L. gasseri	L. gasseri	CECT 5714	GCA_000283135	Breast Milk	1.90779	35	85
L. gasseri	L. gasseri	240_LCRI	GCA_001063045	Lungs	1.79614	34.9	33
L. gasseri	L. gasseri	TF08-1	GCA_003437055	Stool	1.97459	34.8	28
L. gasseri	L. gasseri	MGYG-HGUT-03690	GCA_902399865	Stool	1.97459	34.8	28
L. gasseri	L. gasseri	1001285H_161024_C10	GCA_015546835	Stool	2.00953	34.7	36
L. gasseri	L. gasseri	249_LKEF	GCA_001063065	Lungs	1.79448	34.9	49
L. gasseri	L. gasseri	BC12	GCA_014654855	Vaginal	2.02032	34.7	48
L. gasseri	L. gasseri	UMB0670	GCA_002863445	Urine	1.93217	34.9	52
L. gasseri	L. gasseri	SV-16A-US	GCA_000177035	Urine	2.00174	34.9	10
L. gasseri	L. gasseri	UMB0607	GCA_007785995	Urine	1.88645	34.9	52
L. gasseri	L. gasseri	459_LHEL	GCA_001064985	Lungs	2.07964	34.9	72
L. gasseri	L. gasseri	UMB0045b	GCA_002940965	Urine	1.91255	34.9	59
L. gasseri	L. gasseri	UMB0045	GCA_002863425	Urine	1.91357	34.9	59
L. gasseri	L. gasseri	7171	GCA_006981945	Unknown	1.96378	34.9	111
L. gasseri	L. gasseri	202-4	GCA_000175055	Vaginal	1.82025	34.9	70
L. gasseri	L. gasseri	PSS7772D	GCA_001546525	Urine	1.91445	34.9	64
L. gasseri	L. gasseri	UMB2965	GCA_007785975	Urine	1.80536	34.8	180
L. gasseri	L. gasseri	UMB4205	GCA_007786065	Urine	1.54228	35.3	250
L. gasseri	L. gasseri	UMB1196	GCA_007785965	Urine	1.53581	35.6	328
L. gasseri	L. gasseri	MV-22	GCA_000155935	Vaginal	1.93044	35	2
L. gasseri	L. gasseri	JCM 1131	GCA_000615125	Unknown	1.82325	35	20
L. gasseri	L. gasseri	2016	GCA_000439915	Vaginal	1.87952	35.3	29
L. gasseri	L. gasseri	224-1	GCA_000177415	Vaginal	2.00552	35	37
L. gasseri	L. gasseri	L3_098_121G1_dasL3_098_121G1_concoct_28	GCA_018367595	Stool	1.78144	34.9	17
L. gasseri	L. gasseri	ERR1430442-bin.1	GCA_905202505	Stool	1.82759	34.7	17
L. gasseri	L. gasseri	L3_129_093G1_dasL3_129_093G1_maxbin2.maxbin.012	GCA_018366615	Stool	1.91886	34.8	40
L. gasseri	L. gasseri	UMB1399	GCA_007826985	Urine	1.04194	36.3	224
L. paragasseri	L. gasseri	4M13	GCA_002158885	Stool	2.12937	35	1
L. paragasseri	L. gasseri	MGYG-HGUT-02387	GCA_902386655	Stool	2.12937	35	1
L. paragasseri	L. gasseri	EJL	GCA_013363915	Breast Milk	2.11186	35	1
L. paragasseri	L. gasseri	HL70	GCA_017840575	Stool	2.17646	34.9506	3
L. paragasseri	L. gasseri	HL75	GCA_017498665	Stool	1.98823	35	1
L. paragasseri	L. gasseri	UMB0056	GCA_002884735	Urine	1.90692	34.8	7
L. paragasseri	L. gasseri	UMB0099	GCA_002863455	Urine	1.94582	35	14
L. paragasseri	L. gasseri	LM19	GCA_018728605	Breast Milk	1.97136	34.9	25
L. paragasseri	L. gasseri	AL3	GCA_002007185	Stool	1.98798	34.8	16
L. paragasseri	L. gasseri	AL5	GCA_002003555	Stool	1.98572	34.9	35
L. paragasseri	L. gasseri	FR2	GCA_018389265	Stool	1.96915	34.8	21
L. paragasseri	L. gasseri	Lactobacillus_gasseri_SV_Bg7063_mod2	GCA_902167745	Unknown	2.0417	34.9	36
L. paragasseri	L. gasseri	497_LGAS	GCA_001063505	Lungs	2.09551	34.8	47
L. paragasseri	L. gasseri	JG141	GCA_003315575	Stool	2.04298	34.8	38
L. paragasseri	L. gasseri	987_LJOH	GCA_001068345	Wound	2.05058	34.9	81
L. paragasseri	L. gasseri	7135	GCA_006982025	Unknown	1.96697	34.7	87
L. paragasseri	L. gasseri	505	GCA_001676665	Stool	2.09095	34.7	85
L. paragasseri	L. gasseri	Indica1	GCA_009857935	Vaginal	2.09624	34.9	5
L. paragasseri	L. gasseri	L1_008_092G1_dasL1_008_092G1_metabat.metabat.9	GCA_018378465	Stool	1.94234	34.6	25
L. paragasseri	L. gasseri	SRR413738-bin.18	GCA_905213735	Stool	1.94562	34.7	38
L. paragasseri	L. paragasseri	JCM 5343	GCA_003584685	Stool	1.93763	34.9	1
L. paragasseri	L. paragasseri	NCTC13720	GCA_900636895	Vaginal	1.98216	35	1
L. paragasseri	L. paragasseri	JV-V03	GCA_005886075	Vaginal	2.0303	34.7495	3
L. paragasseri	L. paragasseri	NCK1347	GCA_009734365	Stool	1.9442	35	1
L. paragasseri	L. paragasseri	JV-V03	GCA_000143645	Vaginal	2.01186	34.6	8
L. paragasseri	L. paragasseri	JCM 5343	GCA_003307275	Stool	1.9145	34.7	16
L. paragasseri	L. paragasseri	K7	GCA_000406345	Stool	1.99416	34.8	8
L. paragasseri	L. paragasseri	1001095IJ_161003_B4	GCA_015550525	Stool	2.01849	34.5	11
L. paragasseri	L. paragasseri	JCM 1130	GCA_003307255	Stool	2.02761	34.9	15
L. paragasseri	L. paragasseri	ADH	GCA_018588245	Stool	2.0134	34.9226	18
L. paragasseri	L. paragasseri	J1101004_170508_E2	GCA_015552765	Stool	1.91518	34.7	10
L. paragasseri	L. paragasseri	JCM 5344	GCA_003307295	Vaginal	1.96916	34.7	26
L. paragasseri	L. paragasseri	UMB6975	GCA_007785845	Urine	2.10839	34.8	52
L. paragasseri	L. paragasseri	D6t1_180914_C1	GCA_015560405	Stool	1.99714	34.8	42
L. paragasseri	L. paragasseri	Indica	GCA_010092655	Vaginal	1.93264	34.7	38
L. paragasseri	L. paragasseri	UBLG-36	GCA_014269295	Stool	1.94191	34.9	5
L. paragasseri	L. paragasseri	UMB1065	GCA_007785885	Urine	1.8058	35.2	217
L. paragasseri	L. paragasseri	UMB0596	GCA_007785945	Urine	1.71481	35.3	439
L. paragasseri	L. paragasseri	SRR9217392-mag-bin.9	GCA_905371975	Oral	1.89329	34.6	32
