# Supplementary material for: Genomic insights into Lactobacillus gasseri and Lactobacillus paragasseri
Source: PeerJ. 2022 Jun 7;10:e13479. doi: 10.7717/peerj.13479 (PMC9186330; doi:10.7717/peerj.13479)
Supplement: Table S3 — Cluster names indicate if they are found in both species or just one. [file peerj-10-13479-s003.xlsx]

## Sheet: ST3
Supplementary Table 3. L. gasseri and L. paragasseri phage clusters. Cluster names indicate if they are found in both species or just one.
				Top BLAST Hit Information
Species	Cluster Name	Strain	Assembly Accession #	Description	Accession #	Query Coverage	Nucleotide Sequence Identity
L. gasseri	both_1	JCM 1131	GCA_000615125	Lactobacillus phage phi jlb1, complete genome	NC_024206.1	0.77	0.9943
L. paragasseri	both_1	Lactobacillus_gasseri_SV_Bg7063_mod2	GCA_902167745	TPA: Myoviridae sp. isolate ct1284, partial genome	BK048567.1	0.7	0.935
L. paragasseri	both_1	UMB1065	GCA_007785885	Lactobacillus phage phi jlb1, complete genome	NC_024206.1	0.93	1
L. gasseri	both_1	BIO6369	GCA_008868535	TPA: Myoviridae sp. isolate ct1284, partial genome	BK048567.1	0.68	0.9438
L. gasseri	both_1	UMB1196	GCA_007785965	TPA: Myoviridae sp. isolate cthqQ4, partial genome	BK028044.1	0.66	0.953
L. paragasseri	both_1	JV-V03	GCA_000143645	TPA: Myoviridae sp. isolate cthqQ4, partial genome	BK028044.1	0.69	0.9655
L. gasseri	both_1	BC12	GCA_014654855	Lactobacillus phage phi jlb1, complete genome	NC_024206.1	0.73	0.9608
L. paragasseri	both_1	ADH	GCA_018588245	Lactobacillus phage phi jlb1, complete genome	NC_024206.1	0.93	1
L. gasseri	both_1	UMB1399	GCA_007826985	TPA: Myoviridae sp. isolate ctjNb3, partial genome	BK049738.1	1	0.9997
L. paragasseri	both_2	505	GCA_001676665	Lactobacillus phage JNU_P11, complete genome	MN830257.1	0.21	0.996
L. gasseri	both_2	CECT 5714	GCA_000283135	Lactobacillus phage JNU_P11, complete genome	MN830257.1	0.22	0.987
L. paragasseri	both_2	HL70	GCA_017840575	Lactobacillus phage JNU_P11, complete genome	MN830257.1	0.16	0.9958
L. paragasseri	both_3	JCM 5343	GCA_003307275	Lactobacillus phage phi jlb1, complete genome	NC_024206.1	0.81	0.9638
L. paragasseri	both_3	K7	GCA_000406345	TPA: Myoviridae sp. isolate ct1284, partial genome	BK048567.1	0.71	0.9356
L. paragasseri	both_3	JCM 5343	GCA_003584685	Lactobacillus phage phi jlb1, complete genome	NC_024206.1	0.74	0.9642
L. gasseri	both_3	ATCC 33323	GCA_008868295	Lactobacillus phage phi jlb1, complete genome	NC_024206.1	0.68	0.9944
L. gasseri	both_3	NCTC13722	GCA_900452355	Lactobacillus phage phi jlb1, complete genome	NC_024206.1	0.68	0.9944
L. gasseri	both_3	L3_129_093G1_dasL3_129_093G1_maxbin2.maxbin.012	GCA_018366615	TPA: Myoviridae sp. isolate cthqQ4, partial genome	BK028044.1	0.75	0.9933
L. gasseri	both_4	7171	GCA_006981945	TPA: Siphoviridae sp. isolate ctbPa1, partial genome	BK051439.1	0.22	0.9997
L. gasseri	both_4	UMB0670	GCA_002863445	TPA: Siphoviridae sp. isolate ctbPa1, partial genome	BK051439.1	0.21	0.9998
L. paragasseri	both_4	UMB6975	GCA_007785845	TPA: Siphoviridae sp. isolate ctyV72, partial genome	BK043454.1	0.47	0.9349
L. gasseri	both_5	CECT 5714	GCA_000283135	Lactobacillus bacteriophage phi adh complete genome	AJ131519.1	0.51	0.8928
L. gasseri	both_5	BIO6369	GCA_008868535	TPA: Siphoviridae sp. isolate ct2Rn7, partial genome	BK056093.1	0.66	0.9226
L. paragasseri	both_5	D6t1_180914_C1	GCA_015560405	TPA: Siphoviridae sp. isolate ct2Rn7, partial genome	BK056093.1	0.79	0.9295
L. gasseri	both_6	PSS7772D	GCA_001546525	TPA: Siphoviridae sp. isolate ctbPa1, partial genome	BK051439.1	0.2	0.9946
L. paragasseri	both_6	D6t1_180914_C1	GCA_015560405	Lactobacillus phage JNU_P7, complete genome	MN830256.1	0.57	0.9415
L. gasseri	both_6	TF08-1	GCA_003437055	TPA: Siphoviridae sp. isolate ctbPa1, partial genome	BK051439.1	0.21	0.984
L. gasseri	both_6	MGYG-HGUT-03690	GCA_902399865	TPA: Siphoviridae sp. isolate ctbPa1, partial genome	BK051439.1	0.21	0.984
L. paragasseri	both_7	Lactobacillus_gasseri_SV_Bg7063_mod2	GCA_902167745	Lactobacillus phage JNU_P7, complete genome	MN830256.1	0.75	0.9569
L. gasseri	both_7	224-1	GCA_000177415	Lactobacillus phage JNU_P7, complete genome	MN830256.1	0.77	0.939
L. paragasseri	both_8	UMB0056	GCA_002884735	TPA: Myoviridae sp. isolate ct1284, partial genome	BK048567.1	0.65	0.9262
L. gasseri	both_8	459_LHEL	GCA_001064985	TPA: Myoviridae sp. isolate cthqQ4, partial genome	BK028044.1	0.69	0.9555
L. paragasseri	both_8	JV-V03	GCA_005886075	TPA: Myoviridae sp. isolate cthqQ4, partial genome	BK028044.1	0.69	0.9655
L. paragasseri	both_9	UMB0099	GCA_002863455	Lactobacillus phage phi jlb1, complete genome	NC_024206.1	0.93	0.9996
L. paragasseri	both_9	JCM 1130	GCA_003307255	Lactobacillus phage phi jlb1, complete genome	NC_024206.1	0.93	1
L. gasseri	both_9	ATCC 33323	GCA_000014425	Lactobacillus phage phi jlb1, complete genome	NC_024206.1	0.63	0.9944
L. gasseri	gasseri_1	UMB0045	GCA_002863425	TPA: Siphoviridae sp. isolate ct8z41, partial genome	BK038609.1	0.47	0.9483
L. gasseri	gasseri_1	UMB0045b	GCA_002940965	TPA: Siphoviridae sp. isolate ct8z41, partial genome	BK038609.1	0.47	0.9483
L. gasseri	gasseri_2	SV-16A-US	GCA_000177035	Lactobacillus phage JNU_P7, complete genome	MN830256.1	0.59	0.9399
L. gasseri	gasseri_3	1001285H_161024_C10	GCA_015546835	TPA: Siphoviridae sp. isolate ct5Hg2, partial genome	BK055683.1	0.18	0.8845
L. gasseri	gasseri_4	BC12	GCA_014654855	TPA: Myoviridae sp. isolate ctC3d4, partial genome	BK043519.1	0.26	0.843
L. gasseri	gasseri_5	PSS7772D	GCA_001546525	TPA: Bacteriophage sp. isolate ctT6v2, partial genome	BK039138.1	0.87	1
L. gasseri	gasseri_6	224-1	GCA_000177415	TPA: Myoviridae sp. isolate cthqQ4, partial genome	BK028044.1	0.41	0.9424
L. gasseri	gasseri_6	TF08-1	GCA_003437055	TPA: Myoviridae sp. isolate cthqQ4, partial genome	BK028044.1	0.53	0.9421
L. gasseri	gasseri_6	MGYG-HGUT-03690	GCA_902399865	TPA: Myoviridae sp. isolate cthqQ4, partial genome	BK028044.1	0.53	0.9421
L. gasseri	gasseri_7	UMB0607	GCA_007785995	TPA: Bacteriophage sp. isolate ctT6v2, partial genome	BK039138.1	0.94	1
L. gasseri	gasseri_7	1001175st1_D8	GCA_005844525	TPA: Bacteriophage sp. isolate ctT6v2, partial genome	BK039138.1	0.58	0.9093
L. gasseri	gasseri_7	1001175B_160314_D8	GCA_015550315	TPA: Bacteriophage sp. isolate ctT6v2, partial genome	BK039138.1	0.58	0.9093
L. gasseri	gasseri_8	MV-22	GCA_000155935	Lactobacillus bacteriophage phi adh complete genome	AJ131519.1	0.41	0.8789
L. gasseri	gasseri_9	HL20	GCA_017638885	TPA: Myoviridae sp. isolate cthqQ4, partial genome	BK028044.1	0.64	0.9425
L. gasseri	gasseri_9	SV-16A-US	GCA_000177035	TPA: Myoviridae sp. isolate cthqQ4, partial genome	BK028044.1	0.64	0.9425
L. gasseri	gasseri_10	MV-22	GCA_000155935	TPA: Myoviridae sp. isolate cthqQ4, partial genome	BK028044.1	0.51	0.951
L. paragasseri	paragasseri_1	505	GCA_001676665	TPA: Siphoviridae sp. isolate ct74e2, partial genome	BK036361.1	0.46	0.9422
L. paragasseri	paragasseri_1	JCM 5344	GCA_003307295	TPA: Siphoviridae sp. isolate ct74e2, partial genome	BK036361.1	0.38	0.9317
L. paragasseri	paragasseri_1	EJL	GCA_013363915	TPA: Siphoviridae sp. isolate ct74e2, partial genome	BK036361.1	0.25	0.9422
L. paragasseri	paragasseri_2	505	GCA_001676665	TPA: Siphoviridae sp. isolate ctyyO1, partial genome	BK021888.1	0.86	0.9904
L. paragasseri	paragasseri_2	4M13	GCA_002158885	TPA: Siphoviridae sp. isolate ctyyO1, partial genome	BK021888.1	0.68	0.9905
L. paragasseri	paragasseri_2	MGYG-HGUT-02387	GCA_902386655	TPA: Siphoviridae sp. isolate ctyyO1, partial genome	BK021888.1	0.68	0.9905
L. paragasseri	paragasseri_3	JV-V03	GCA_000143645	TPA: Myoviridae sp. isolate ctX8K1, partial genome	BK053278.1	0.4	0.8966
L. paragasseri	paragasseri_4	497_LGAS	GCA_001063505	TPA: Siphoviridae sp. isolate ct8z41, partial genome	BK038609.1	0.49	0.8941
L. paragasseri	paragasseri_4	JCM 1130	GCA_003307255	Lactobacillus bacteriophage phi adh complete genome	AJ131519.1	0.85	0.9975
L. paragasseri	paragasseri_4	UMB0099	GCA_002863455	TPA: Siphoviridae sp. isolate ctROW1, partial genome	BK046694.1	0.69	0.9984
L. paragasseri	paragasseri_4	ADH	GCA_018588245	Lactobacillus bacteriophage phi adh complete genome	AJ131519.1	0.93	0.9975
L. paragasseri	paragasseri_5	HL70	GCA_017840575	TPA: Myoviridae sp. isolate ctX8K1, partial genome	BK053278.1	0.44	0.9162
L. paragasseri	paragasseri_5	FR2	GCA_018389265	TPA: Myoviridae sp. isolate ctX8K1, partial genome	BK053278.1	0.51	0.9976
L. paragasseri	paragasseri_6	JG141	GCA_003315575	TPA: Siphoviridae sp. isolate ct74e2, partial genome	BK036361.1	0.38	0.9325
L. paragasseri	paragasseri_7	EJL	GCA_013363915	Lactobacillus bacteriophage phi adh complete genome	AJ131519.1	0.53	0.8801
L. paragasseri	paragasseri_8	EJL	GCA_013363915	Lactobacillus phage JNU_P11, complete genome	MN830257.1	0.16	0.9958
L. paragasseri	paragasseri_8	4M13	GCA_002158885	Lactobacillus phage JNU_P11, complete genome	MN830257.1	0.16	0.996
L. paragasseri	paragasseri_8	MGYG-HGUT-02387	GCA_902386655	Lactobacillus phage JNU_P11, complete genome	MN830257.1	0.16	0.996
L. paragasseri	paragasseri_9	HL70	GCA_017840575	TPA: Siphoviridae sp. isolate ct74e2, partial genome	BK036361.1	0.3	0.9421
L. paragasseri	paragasseri_10	JV-V03	GCA_005886075	TPA: Myoviridae sp. isolate ctX8K1, partial genome	BK053278.1	0.36	0.8966
L. paragasseri	paragasseri_11	Lactobacillus_gasseri_SV_Bg7063_mod2	GCA_902167745	TPA: Siphoviridae sp. isolate ct0ju20, partial genome	BK027355.1	0.5	0.9882
L. paragasseri	paragasseri_12	EJL	GCA_013363915	TPA: Siphoviridae sp. isolate ctyyO1, partial genome	BK021888.1	0.68	0.9905
L. paragasseri	paragasseri_12	JG141	GCA_003315575	TPA: Siphoviridae sp. isolate ctyyO1, partial genome	BK021888.1	0.77	0.9796
L. paragasseri	paragasseri_13	AL3	GCA_002007185	TPA: Myoviridae sp. isolate ctX8K1, partial genome	BK053278.1	0.5	0.9974
L. paragasseri	paragasseri_14	Indica1	GCA_009857935	TPA: Siphoviridae sp. isolate ct0ju20, partial genome	BK027355.1	0.2	0.9967
L. paragasseri	paragasseri_15	HL75	GCA_017498665	TPA: Siphoviridae sp. isolate ct0ju20, partial genome	BK027355.1	0.39	1
L. paragasseri	paragasseri_16	UBLG-36	GCA_014269295	TPA: Myoviridae sp. isolate cthqQ4, partial genome	BK028044.1	0.77	0.9994
L. paragasseri	paragasseri_17	7135	GCA_006982025	TPA: Myoviridae sp. isolate ctjNb3, partial genome	BK049738.1	0.94	0.9994
L. paragasseri	paragasseri_18	987_LJOH	GCA_001068345	TPA: Myoviridae sp. isolate ct1284, partial genome	BK048567.1	0.87	0.9575
L. paragasseri	paragasseri_19	LM19	GCA_018728605	TPA: Siphoviridae sp. isolate ctP3d8, partial genome	BK050632.1	0.29	0.9002
